# Supplementary material
Source: Springer Nature journal article supplement (https://www.springermedizin.de/resource/supplementary/12890_2013_584_MOESM1_ESM.pdf/9505374)

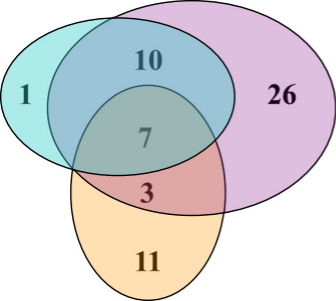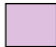

NATs

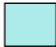

Viral culture

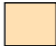

Serological test

Supplement: MOESM1 [file 9505374]
